# Supplementary material for: TrkA is amplified in malignant melanoma patients and induces an anti-proliferative response in cell lines
Source: PubMed Central journal article supplement (PMC4619539; doi:10.1186/s12885-015-1791-y), 2015-10-24

**Figure S1**

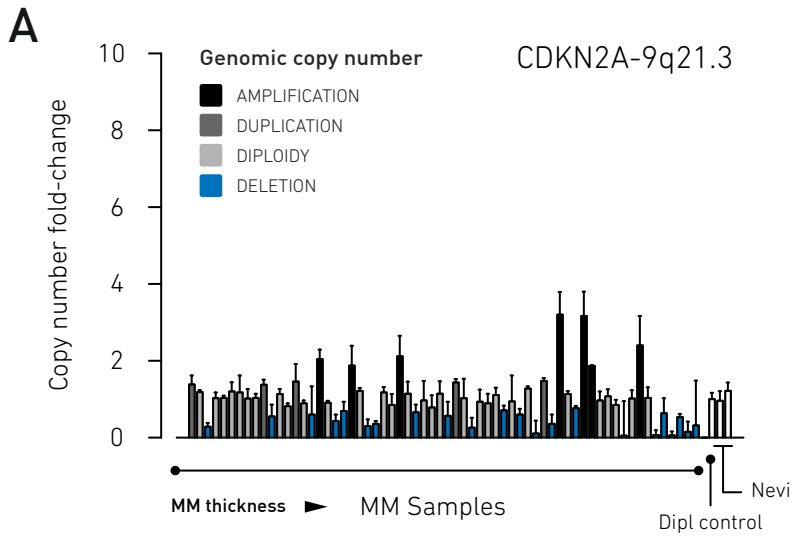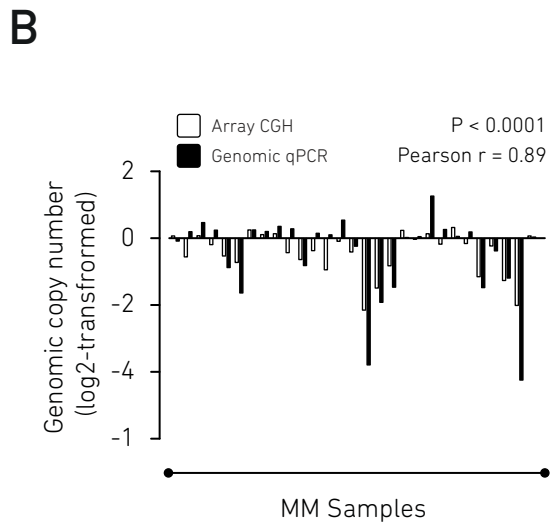

**Figure S2**

**A**

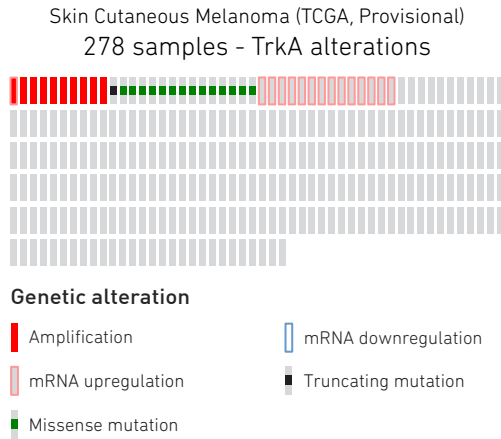

**B**

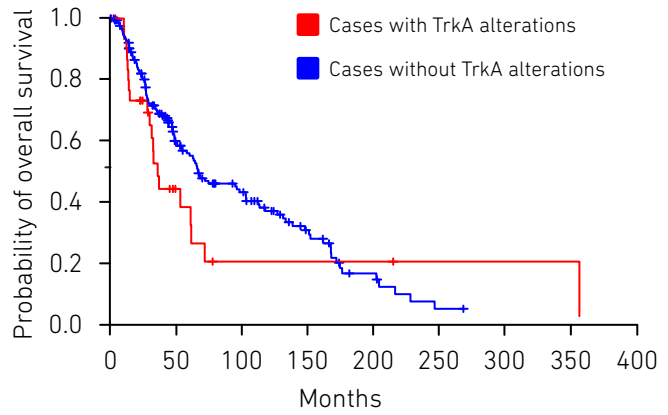

**C**

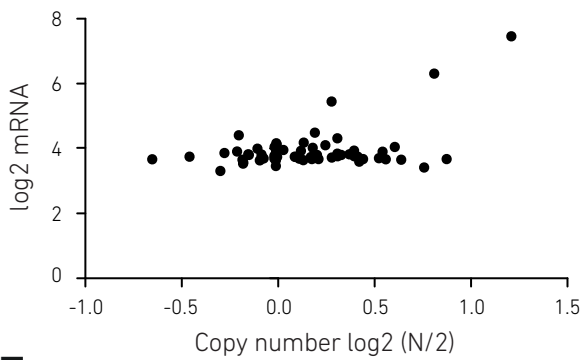

**D**

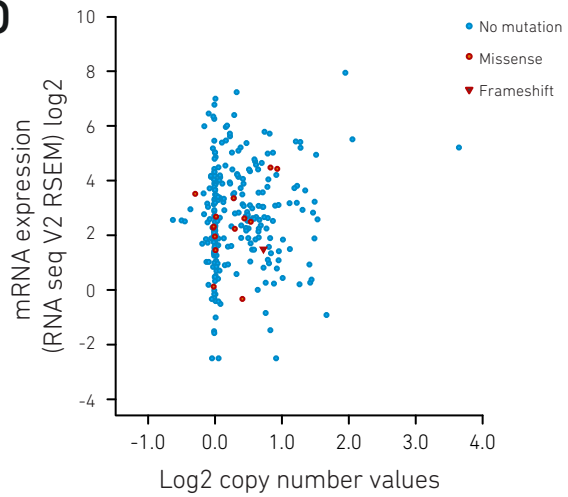

**E**

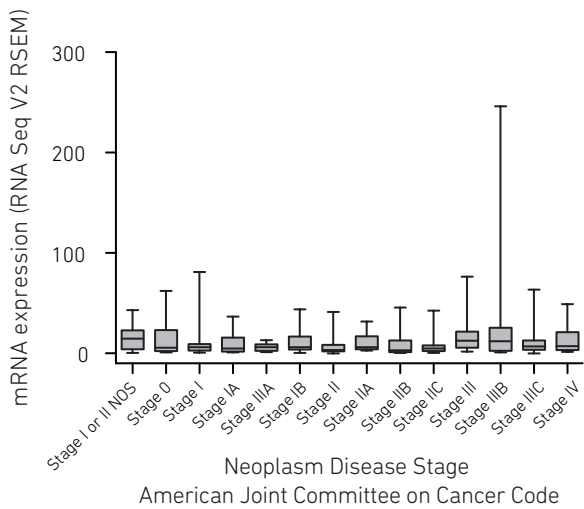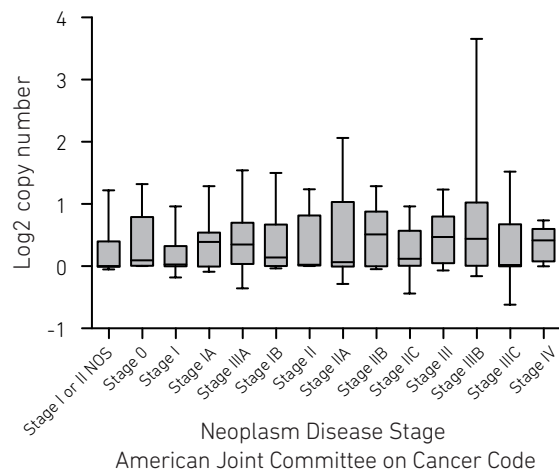

**Figure S3**

**A**

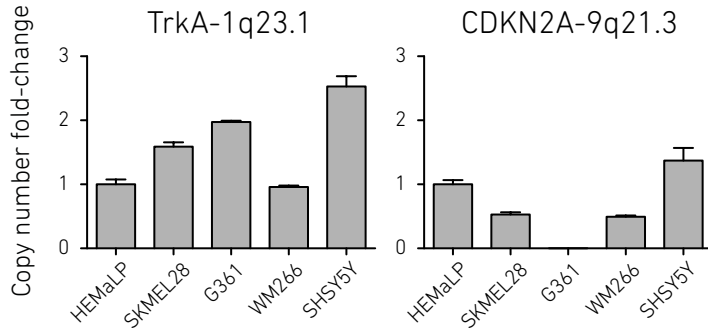

**B**

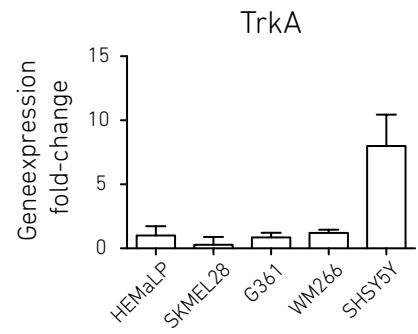

**C**

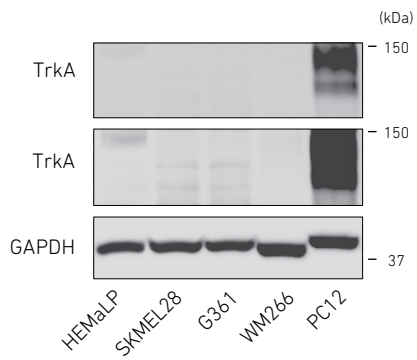

**D**

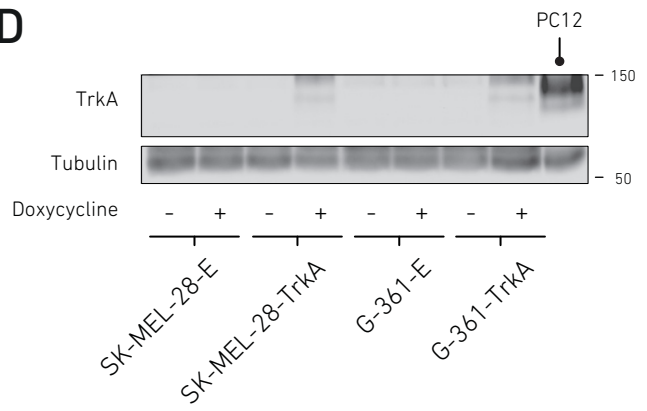

**Figure S4**

**A**

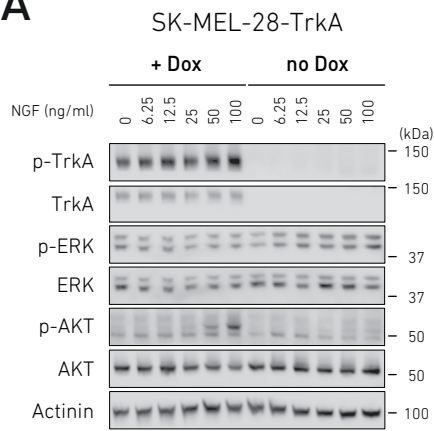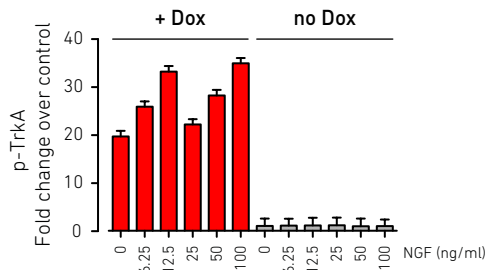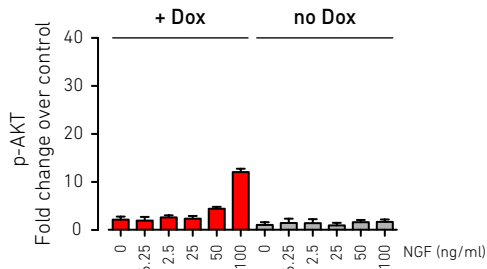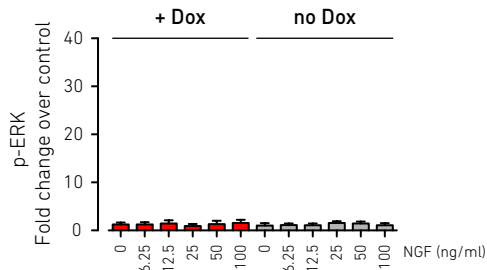

**B**

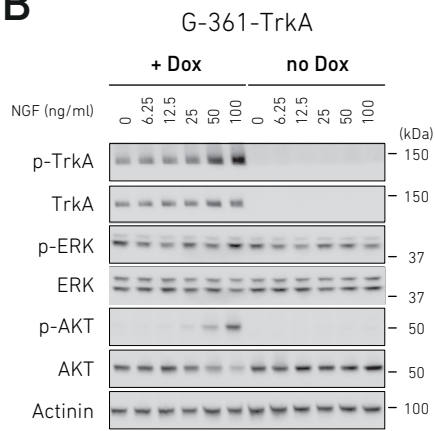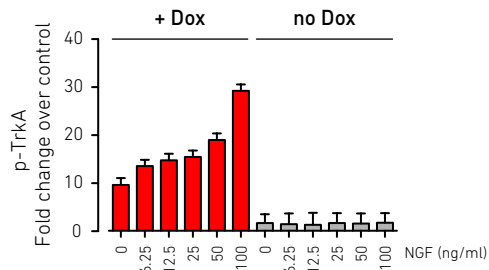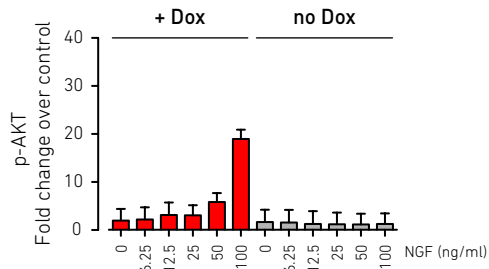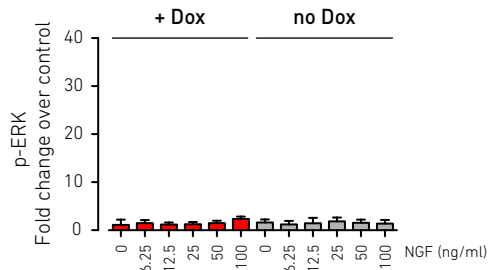

**Figure S5**

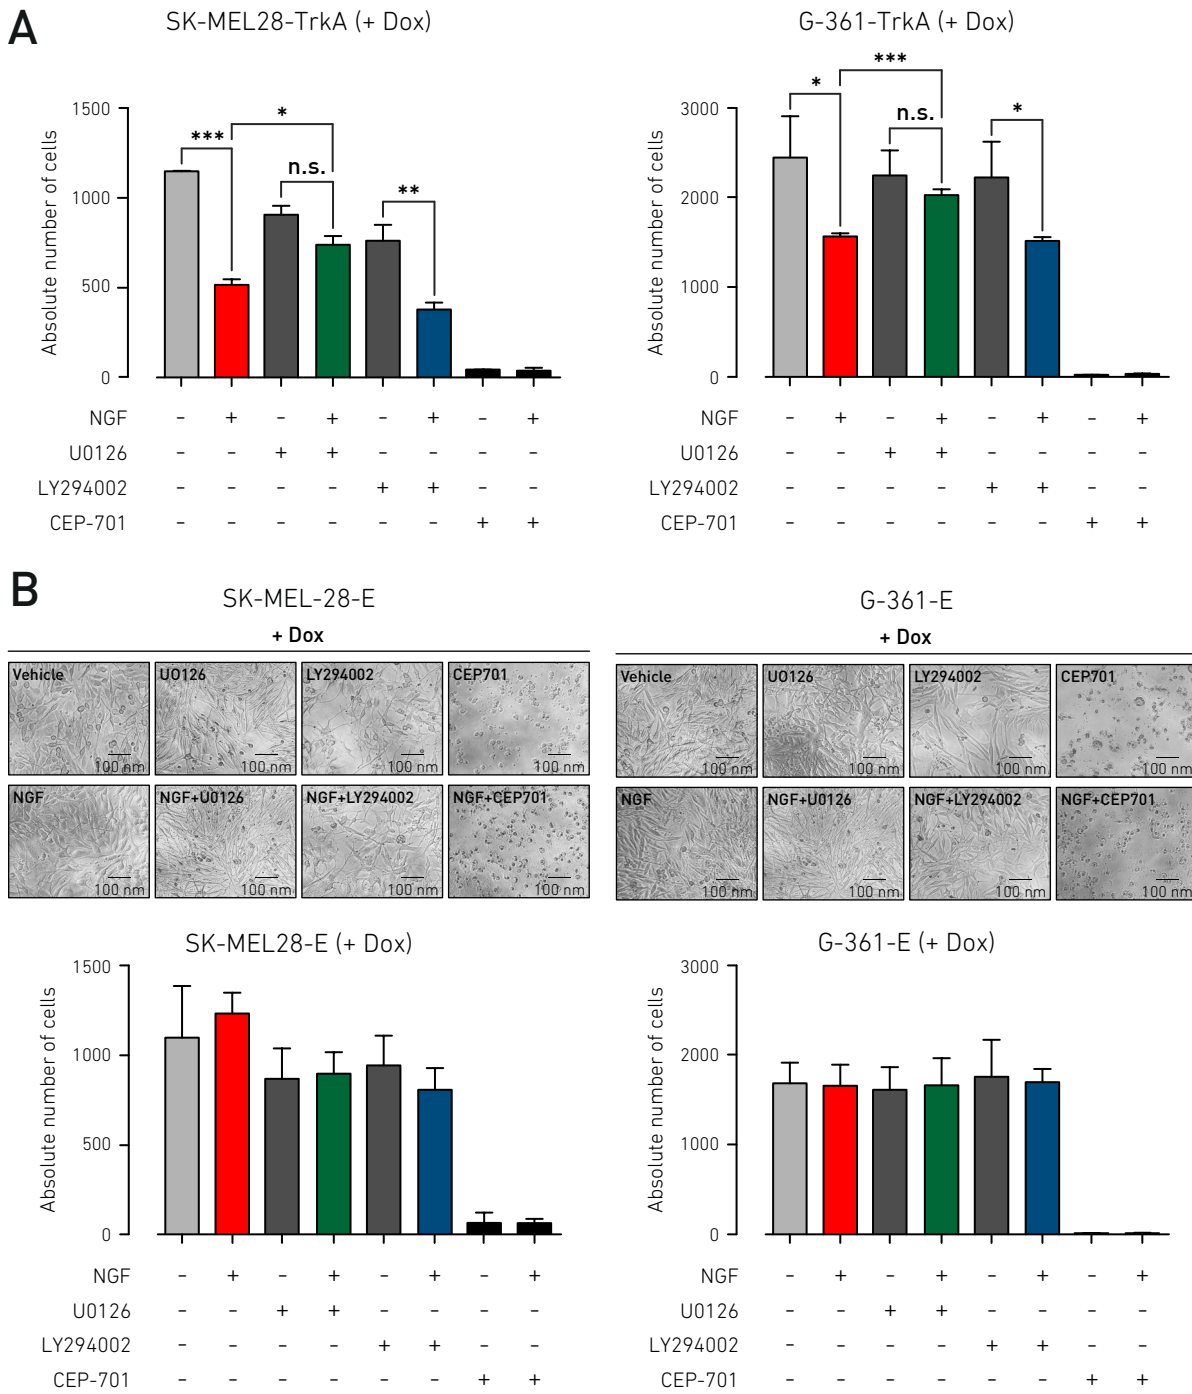

**Figure S6**

**A**

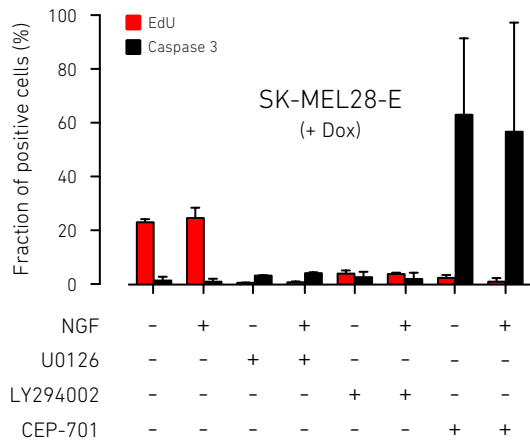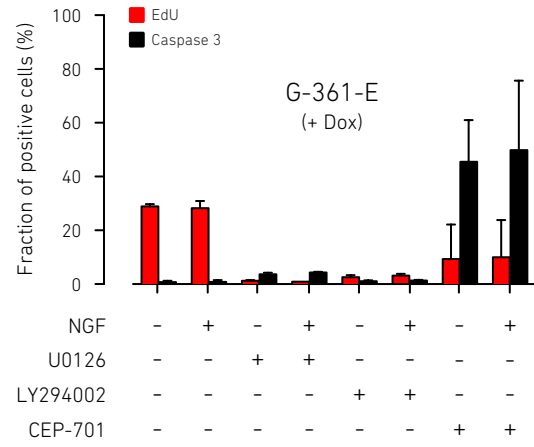

**B**

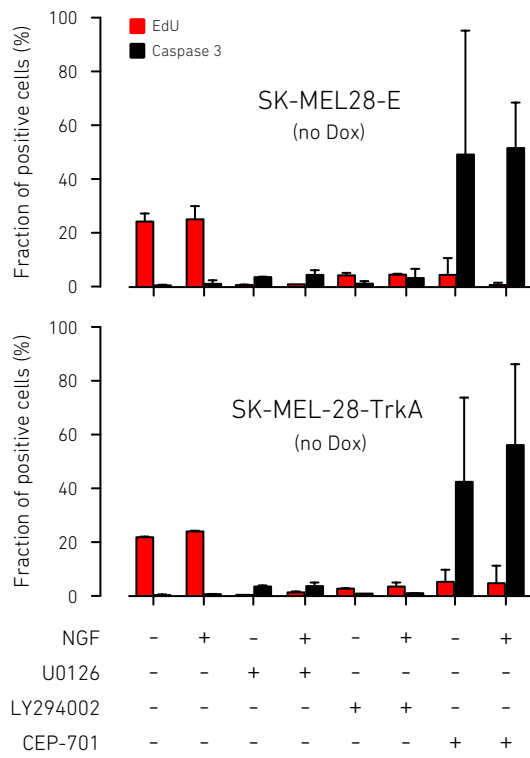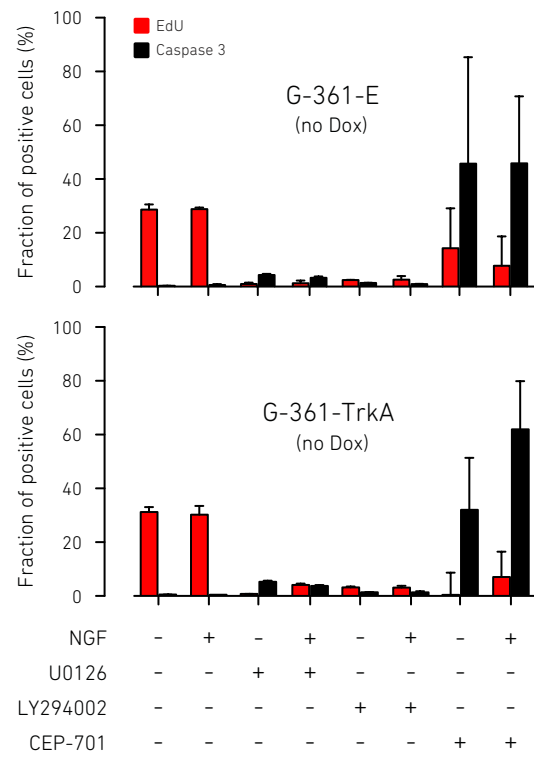

**Figure S7**

**A**

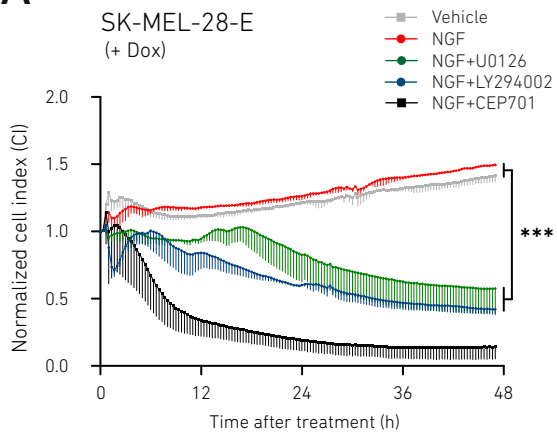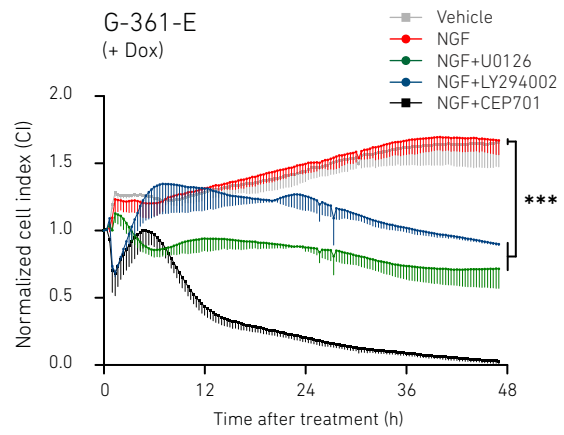

**B**

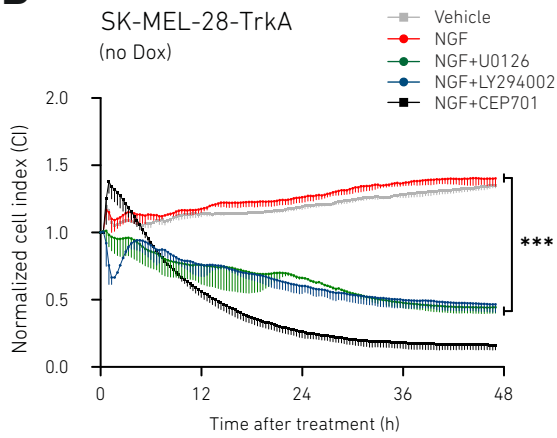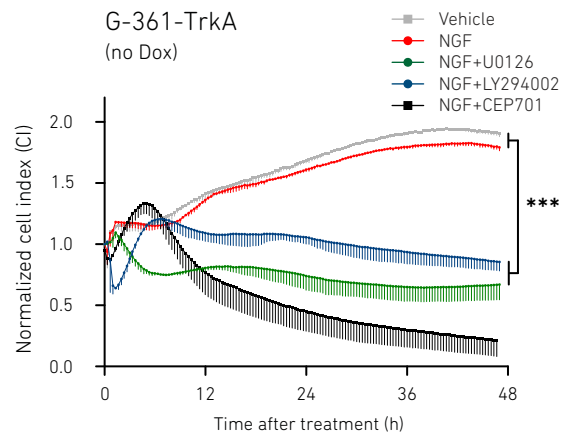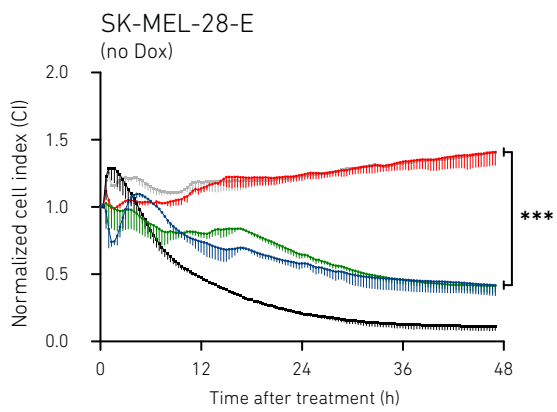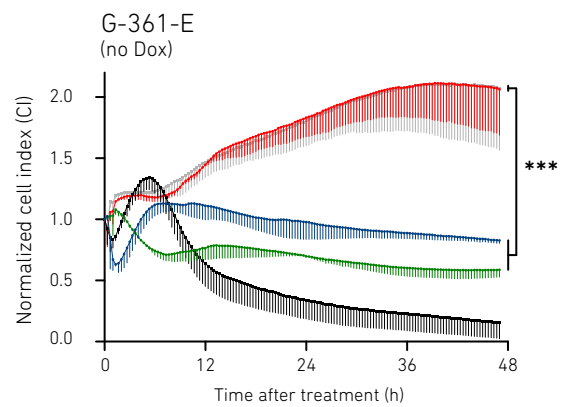

**Figure S8**

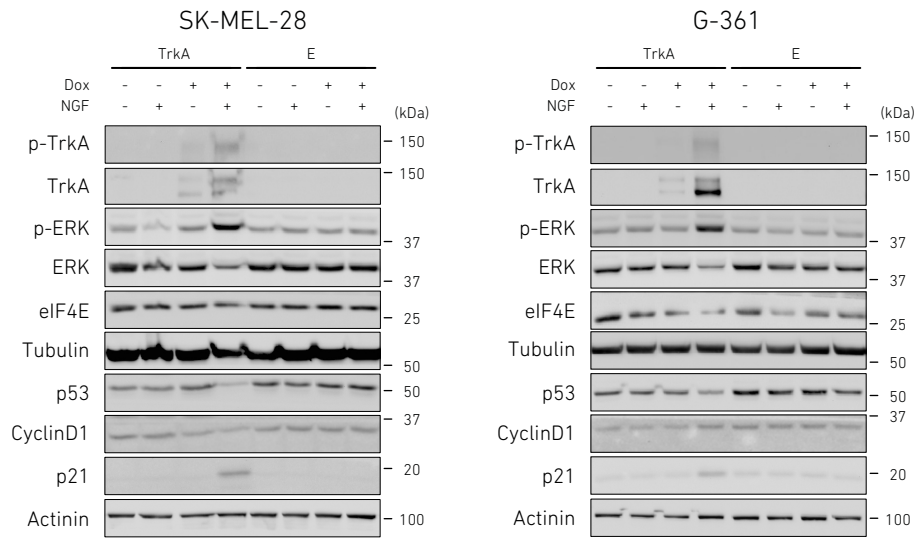



**Figure S9**

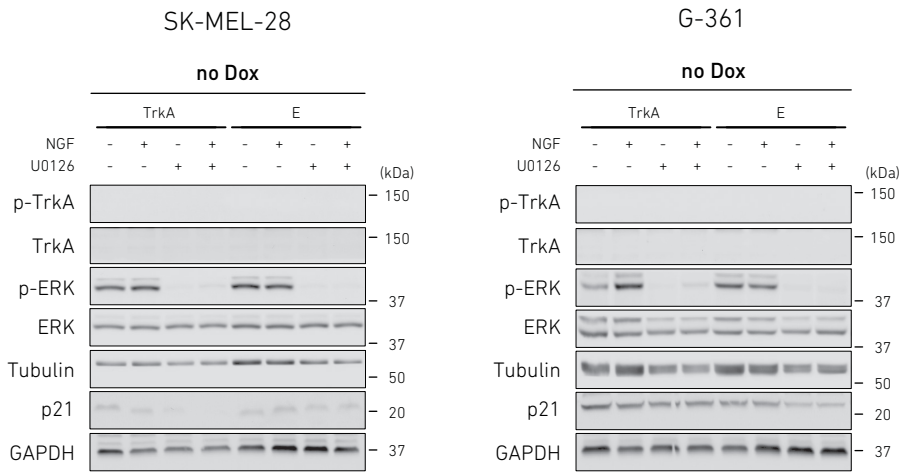

**Figure S10**

**A**

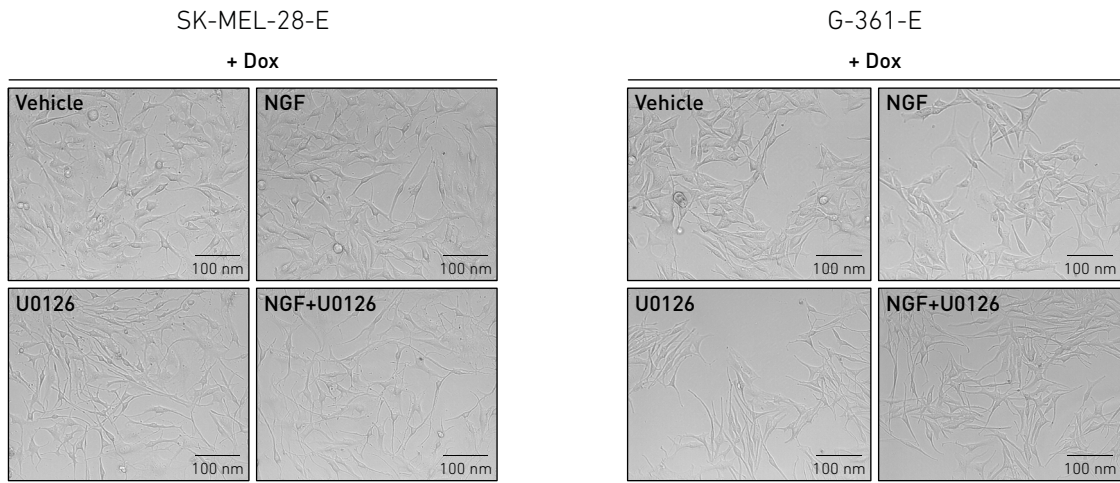

**B**

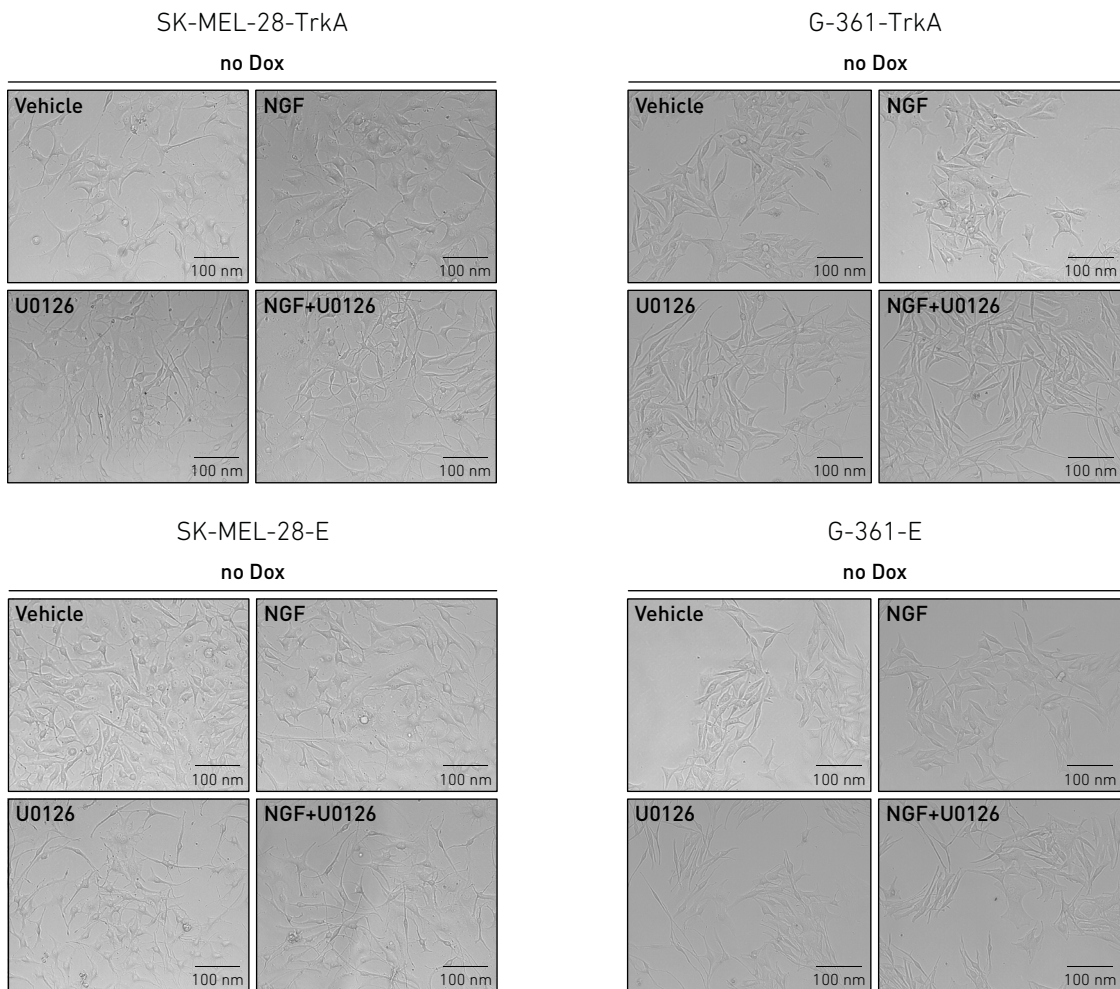

Supplement: 12885_2015_1791_MOESM2_ESM.pdf [file 12885_2015_1791_MOESM2_ESM.pdf]
